# Supplementary material
Source: bioRxiv or medRxiv preprint supplement (https://www.biorxiv.org/highwire/filestream/55449/field_highwire_adjunct_files/0/183376-1.pdf)

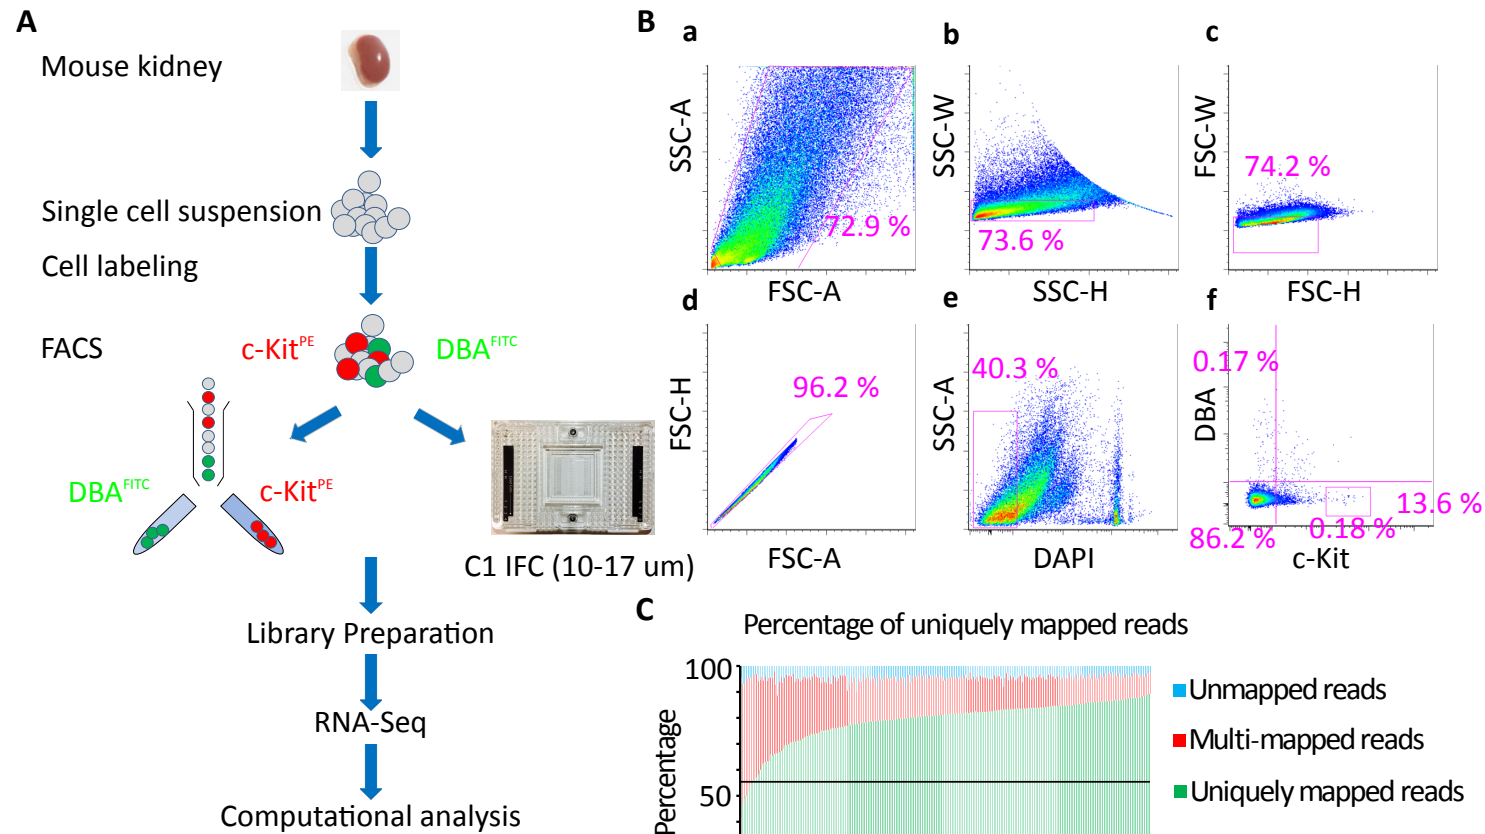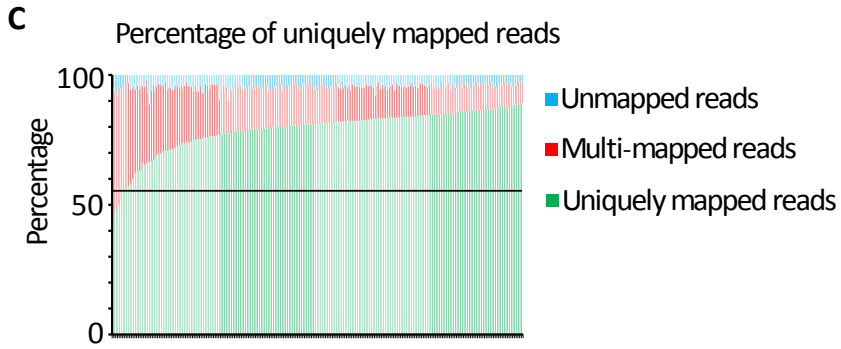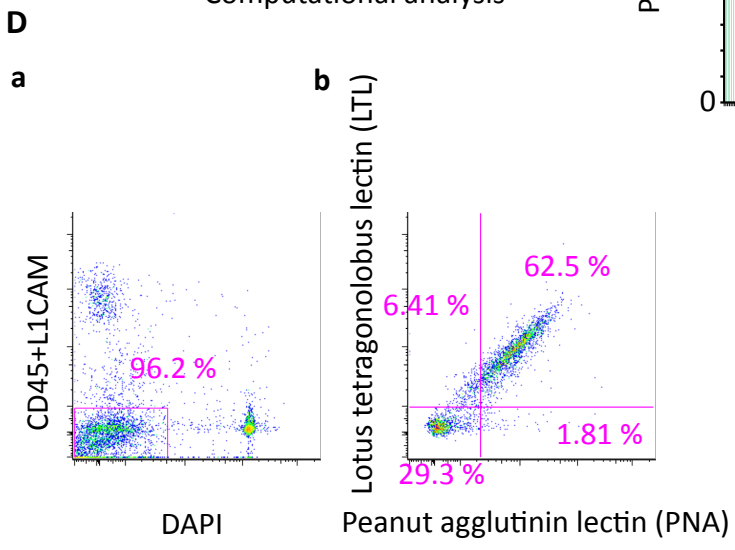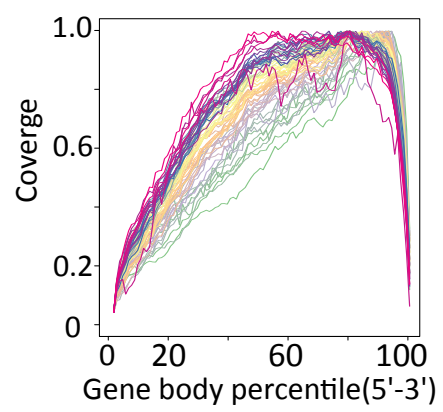

Supplement: Supplementary file [file 183376-1.pdf]
